# Supplementary material for: KaiA regulates intracellular oxygen dynamics in unicellular diazotrophic cyanobacteria
Source: Research Square preprint supplement (doi:10.21203/rs.3.rs-2625388/v1), 2023-03-22
Supplement: Supplementary file 1 [file fde227e98dd4ea4362437892.docx]

**KaiA regulates intracellular oxygen dynamics in unicellular diazotrophic cyanobacteria**

Anindita Bandyopadhyay, Annesha Sengupta, Himadri B. Pakrasi*

Department of Biology, Washington University, St. Louis, MO, USA;

***Corresponding author:**  Himadri B. Pakrasi, ﻿[pakrasi@wustl.edu](mailto:pakrasi@wustl.edu)

.

Supplementary Figure 1

Fig. S1. Alignment of the *Cyanothece* 51142 *kaiABC* gene cluster and its neighborhood. The cluster and its neighborhood are conserved among unicellular diazotrophic cyanobacteria.

Lane1, 2: WT and clock mutants probed with primers upstream and downstream of the respective genes (flanking primers)

Lane3, 4: WT and clock mutants probed with internal gene specific primers

Fig. S2. Generation of clock mutants in *Cyanothece* 51142 using CRISPR-Cas12. Three gRNAs were designed to completely delete individual *kai* genes, *kaiA*, *kaiB* and *kaiC*, leaving the upstream and downstream regions intact. Antibiotic resistant colonies obtained after conjugation were screened by PCR (primers flanking the deleted gene and 300 bp gene specific primers) to confirm gene deletion and determine segregation. While ∆*kaiA* (A) and ∆*kaiB* (B) showed complete segregation, ∆*kaiC* (C) retained a WT copy of the gene along with a smaller mutant band (arrow) even after multiple rounds of patching on antibiotic plates.

Supplementary Figure 2

300bp

C

B

A

Fig. S3. Deletion of clock genes in *Cyanothece* 51142 leads to distinct growth phenotypes. The WT exhibits prominent endogenous rhythms of ~ 24h (16:8 h phases) under CL and nitrogen fixing conditions. The rhythm is altered in the ∆*kaiB* mutant and is severely dampened /lost in the ∆*kaiA* mutant.

Supplementary Figure 3


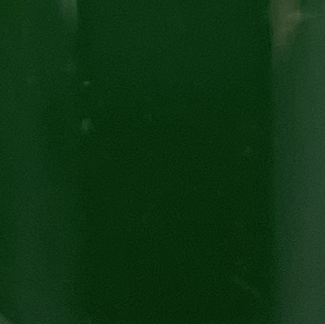

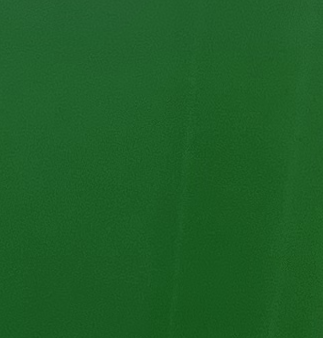

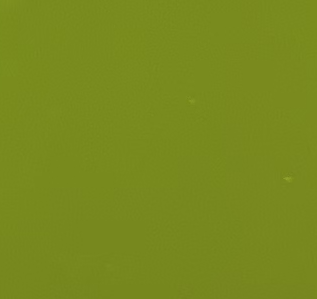

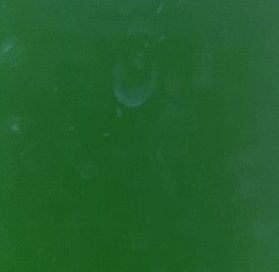


Fig. S4. Photosynthetic pigment analysis. Whole cell absorption spectra and pigment estimation for WT and ∆*kaiA* strains of *Cyanothece* 51142 grown under CL (A, C) and 12:12 LD (B, D) conditions in nitrogen deficient media. The mutant shows a bleached phenotype which corresponds with the phycocyanin levels. Representative data are shown as the average of three biological replicates, and error bars show the standard deviation from the average.

WT

∆*kaiA*

WT

∆*kaiA*

D

C

B

A

Supplementary Figure 4

Supplementary Figure 5

A

B

Fig. S5. Arrhythmic endogenous rhythms reflected in the growth phenotype of the ∆*kaiA* strain. Growth under 8:16 LD (A) and 20:4 LD (B) cycles followed by CL.

Fig. S6. Comparison of expression levels of representative genes from nitrogen fixation (A), respiration (B) and photosynthetic (C) pathways. Relative fold change (2−ΔΔCt) in respective gene expression of *∆kaiA* in relation to WT. Samples for RNA extraction were collected from both CL and LD (L2 and D2 time points) grown cultures. Error bars represent standard deviation of 2−ΔΔCt values (*n* = 3 or 4) from the average.

C

B

A

Supplementary Figure 6

Supplementary Figure 7

Supplementary Figure 9

Fig. S7. Comparison of nitrogenase activity in the WT and ∆*kaiA* strains grown under 8:16 LD cycles. Activity is expressed as % WT activity under 12:12 LD growth. Representative data are shown as the average of three biological replicates, and error bars show the standard deviation from the average.

Fig. S8 Comparison of photosynthetic oxygen evolution (A) and respiratory oxygen uptake (B) in the WT and ∆*kaiA* strains. Oxygen evolution and oxygen uptake rates were measured in samples undergoing aerobic incubation for nitrogen fixation at the beginning of the incubation period (T0) and 6h after incubation in the subjective dark phase (T6). Representative data are shown as the average of three biological replicates, and error bars show the standard deviation from the average.

B

A

Supplementary Figure 8

Fig. S9 Comparison of WT and ∆*kaiA* strains grown in nitrogen replete media under LD cycles followed by CL

| **Primers used in the CRISPR-Cas12a approach** | |
| --- | --- |
| *kaiA*-gRNA-F  *kaiA*-gRNA-R | 5’-agatcaaacccgactctcaatttg  5’-agaccaaattgagagtcgggtttg |
| *kaiA*-up-repair-F  *kaiA*-up-repair-R | 5’catttttttgtctagctttaatgcggtagttggtaccgctagaagtgttgcatcaaaatc  5’-ggccatctataaaggaggatctcaagaatgagagtacaactcct |
| *kaiA*-down-repair-F  *kaiA*-down-repair-R | 5’-gaggagttgtactctcattcttgagatcctcctttatagatggcc  5’-cgctgcccggattacagatcctctagagtcgacggtaccggggattcctcaaaggtaac |
| Flanking primer -F  Flanking primer -R | 5’-cgatccattaattgaaatagtcagc  5’-cgacgtagagtttgagaacatagg |
| gene specific – F  gene specific - R | 5’ ggtgcctttcttggaagatc  5’-gtaatggcacgatcaatggttac |
|  |  |
| *kaiB1*-gRNA-F  *kaiB1*-gRNA-R | 5’-acttcaaaaaaacctatgtt  5’-aacataggtttttttgaagt |
| *kaiB1*-up-repair-F  *kaiB1*-up-repair-R | 5’-gtctagctttaatgcggtagttggtacccgatgaacatctcacc  5’-ccttgaatcgaatcggactatttttctataaaggaggatcatctgaaaacatatc |
| *kaiB1*-down-repair-F  *kaiB1*-down-repair-R | 5’-gatatgttttcagatgatcctcctttatagaaaaatagtccgattcgattcaagg  5’-cgctgcccggattacagatcctctagagtcgacggtaccgggaagatattaatgccatc |
| Flanking primer -F  Flanking primer -R | 5’-ctatccacagaccattgcaaacc  5’-cattggatgatcgttgtgttaatct |
| gene specific – F  gene specific - R | 5’-caaactctacgtcgctggtaatac  5’-cttcatagagaagatccaagcc |
|  |  |
| *kaiC1*-gRNA-F  *kaiC1*-gRNA-R | 5’-agatgcccctaaaggtgttcgcaa  5’-agacttgcgaacacctttaggggc |
| *kaiC1*-up-repair-F  *kaiC1*-up-repair-R | 5’-catttttttgtctagctttaatgcggtagttggtacccagaggtaaatcaagctattg  5’-caaaatttgtcaatgtctcaagactgctttataatcgttttataattaac |
| *kaiC1*-down-repair-F  *kaiC1*-down-repair-R | 5’-gttaattataaaacgattataaagcagtcttgagacattgacaaattttg  5’-cgctgcccggattacagatcctctagagtcgacggtaccgtcatcacctgtaacacttcag |
| Flanking primer -F  Flanking primer -R | 5’-ctccagaggataaacgagaattac  5’-cgagcattggatgatcgttgtg |
| gene specific – F  gene specific - R | 5’-cgatgctgcatctgtggtgagac  5’-cgagcattggatgatcgttgtg |
| **Primers used in the Conventional approach – Kanamycin insertion** | |
| *kaiC1*-upstream-F  *kaiC1*-upstream-R | 5’-ggcagaaattcgatatctagatctcgagcagaggtaaatcaagctattgatc  5’-ctggtatgagtcagcaacaccttctgactgctttataatcgttttataattaac |
| Kanamycin-F  Kanamycin-R | 5’-Fgttaattataaaacgattataaagcagtcagaaggtgttgctgactcataccag  5’-ccttttttacaaaatttgtcaatgtctcaattagaaaaactcatcgagcatcaaatg |
| *kaiC1*-downstream-F  *kaiC1*-downstream-R | 5’-catttgatgctcgatgagtttttctaattgagacattgacaaattttgtaaaaaagg  5’-gtttgcgcaacgttgttgccattgctgcagcgatagagtcgacaccataaaggattttc |
| Flanking primer -F  Flanking primer -R | 5’-ctccagaggataaacgagaattac  5’-cgagcattggatgatcgttgtg |
| gene specific – F  gene specific - R | 5’-cgatgctgcatctgtggtgagac  5’-cgagcattggatgatcgttgtg |

Table S1. Primers used to create clock mutants in *Cyanothece* 51142

Table S2. Primers used for Q-RTPCR analysis

| *nifB*-F  *nifB*-R | 5'-cagtgaagatgcccatcatcac  5'-gttgagttctttaatgcgatcaacg |
| --- | --- |
| *nifD*-F  *nifD*-R | 5'-ggatatggttcacatctcccacg  5'-gatgtggtgtcctaaggactgag |
| *nifH*-F  *nifH*-R | 5'-gagaatcaactatgcgtcagattgc  5'-catccaactccaggctcaggac |
| *nifV*-F  *nifV*-R | 5'-gcgatcgcttgtttaatggatg  5'-cgaataaatcgtgatctagcgc |
| *ctaB*-F  *ctaB*-R | 5'-gtggactcctttagactctttattacc  5'gcatatagaaggcaataccggac |
| *petE*-F  *petE*-R | 5'ctccagcttcttcattgctgttag  5'-ctccaggctcgttgaaggtttc |
| *sdhA*-F  *sdhA*-R | 5'-caccccactgggttatatcctg  5'-gtggcgcaagtcgagatagac |
| *coxC1*-F  *coxC1*-R | 5'-ccctgtttttagtggcggaaag  5'-ctggcgaataaattggtcgttaatc |
| *coxB3*-F  *coxB3*-R | 5'-gaagggaatgtcaccttagaagtgg  5'-cacatcttctgaggttaacgctaac |
| *coxA1*-F  *coxA1*-R | 5'-ccaatttatgaccctacatggcac  5'-ccaacaaaacagaggcatactgtg |
| *psaA*-F  *psaA*-R | 5'-ctttagcgcgcacttcggtc  5'-gaaccagccagcaaacagcattag |
| *psbA*-F  *psbA*-R | 5'-ggtttggagtcttaatgatcccaacac  5'-ccaaggccgcattcctaatcgataac |
| *psbO*-F  *psbO*-R | 5'-tggatgatctgtgtctcgaacc  5'-gttctcctccaggtaactgaacg |
